# Supplementary material
Source: PubMed Central journal article supplement (PMC2984146)
Supplement: 1006823107_pnas.201006823SI.pdf [file 1006823107_pnas.201006823SI.pdf]

# Supporting Information

Harrison et al. 10.1073/pnas.1006823107

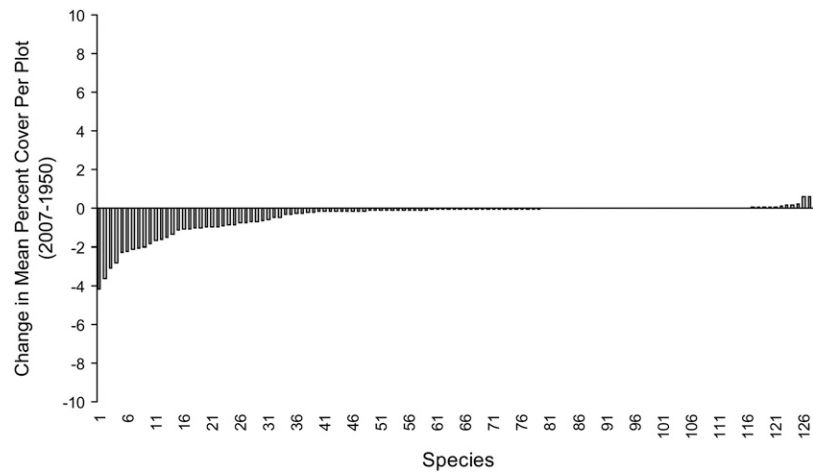

Fig. S1. Changes in percent of cover by individual species per plot from 1950 to 2007. Each species in the community is represented by a number on the x axis.

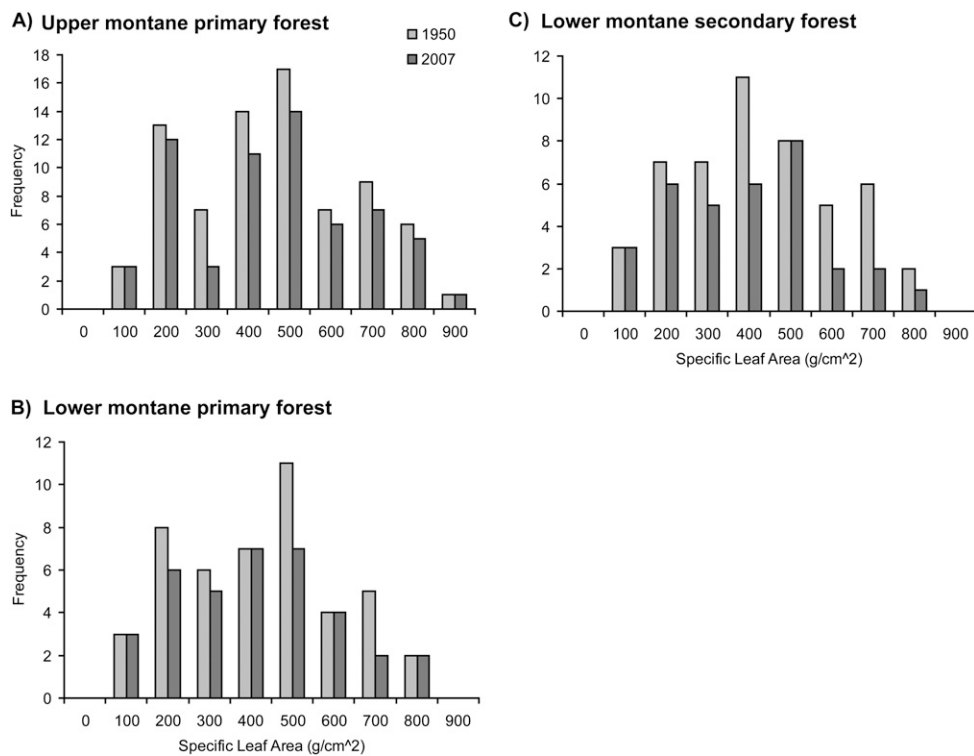

Fig. S2. The distribution of specific leaf area values in 1950 and 2007 for each community type: (A) upper montane primary forest, (B) lower montane primary forest, and (C) lower montane secondary forest.

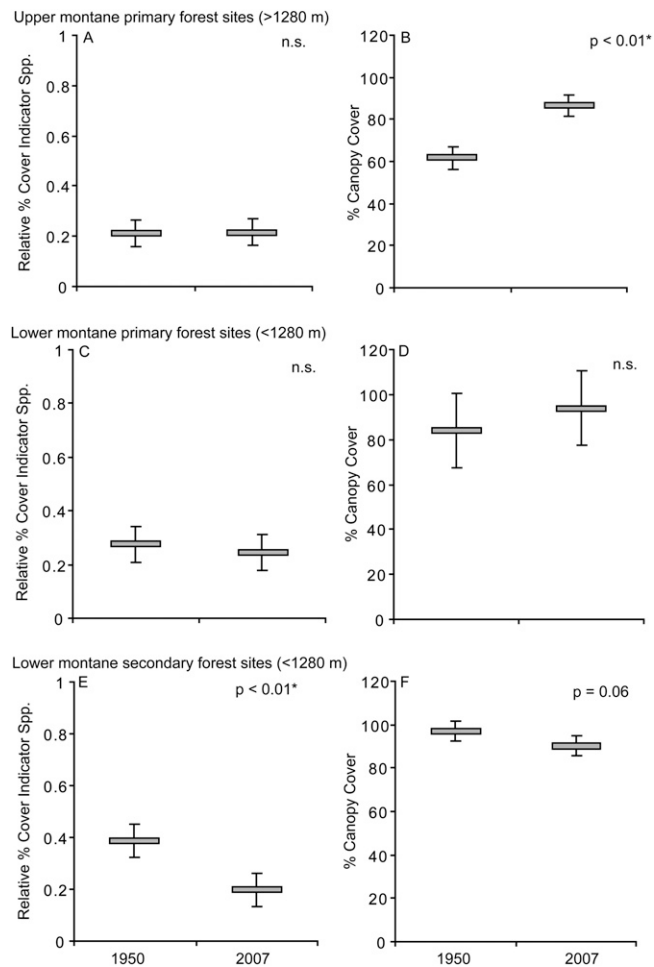

**Fig. S3.** Plant-community changes related to succession. Means and 95% confidence limits are shown for the changes in tree-canopy cover and relative late-seral indicator species per plot. Means are shown for each response variable in upper montane sites (*A* and *B*), lower montane sites (*C* and *D*), and lower montane second-growth sites (*E* and *F*). We used separate *t* tests to determine if the difference over time was significantly different from zero and applied a Dunn–Sidak correction for multiple comparisons. Raw *P* values are given; an asterisk indicates a comparison that remained significant following the correction procedure where the error rate was set at 0.05. n.s., not significant.
